# Supplementary material for: Eosinophils affect functions of in vitro-activated human CD3-CD4+ T cells
Source: PubMed Central journal article supplement (PMC3659088; doi:10.1186/1479-5876-11-112), 2013-05-06

Supplementary Figure 2a. Eosinophil-induced enhancement of CD4 T cell proliferation is dose-dependent.

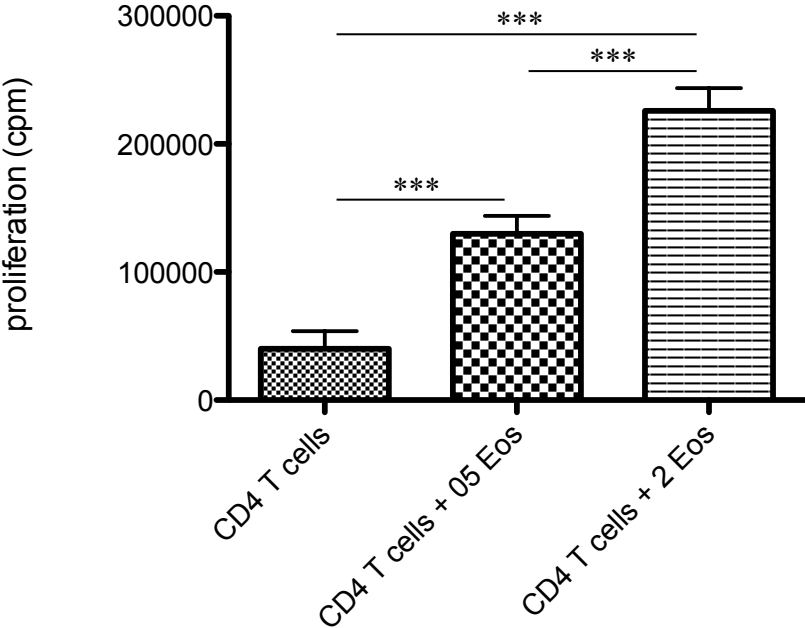

Supplementary Figure 2b. Eosinophil-induced enhancement of CD4 T cell proliferation is dose-dependent.

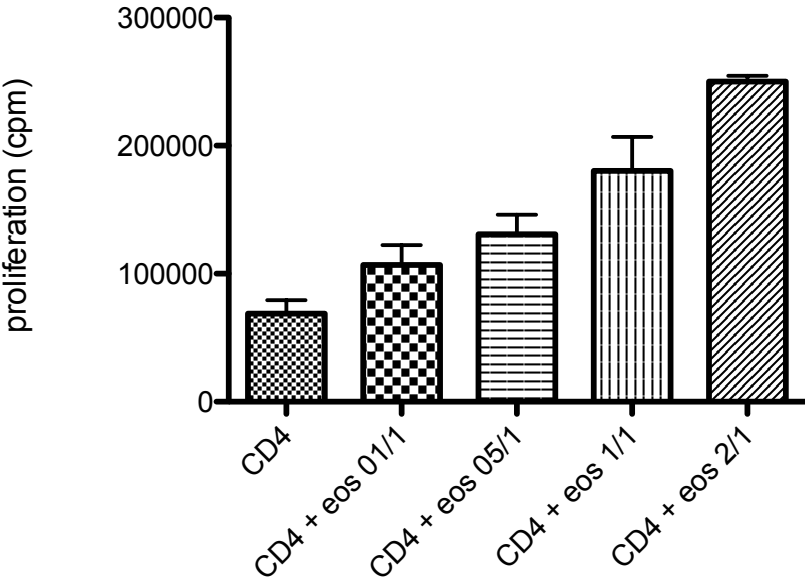

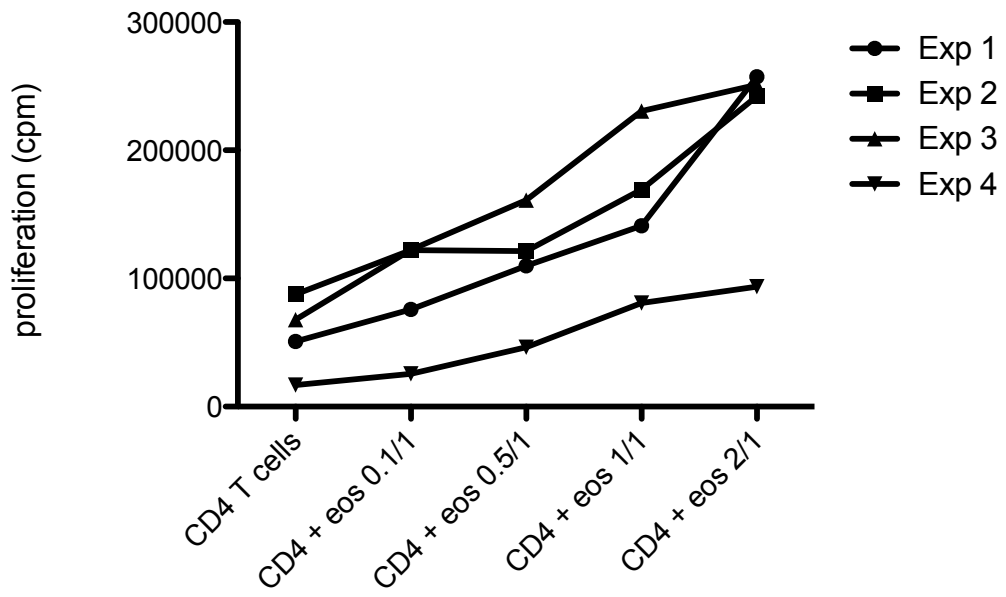

Supplement: 1479-5876-11-112-S1.pdf [file 1479-5876-11-112-S1.pdf]
